# Supplementary material
Source: Springer Nature journal article supplement (https://www.springermedizin.de/resource/supplementary/13223_2011_308_MOESM1_ESM.pdf/9597526)

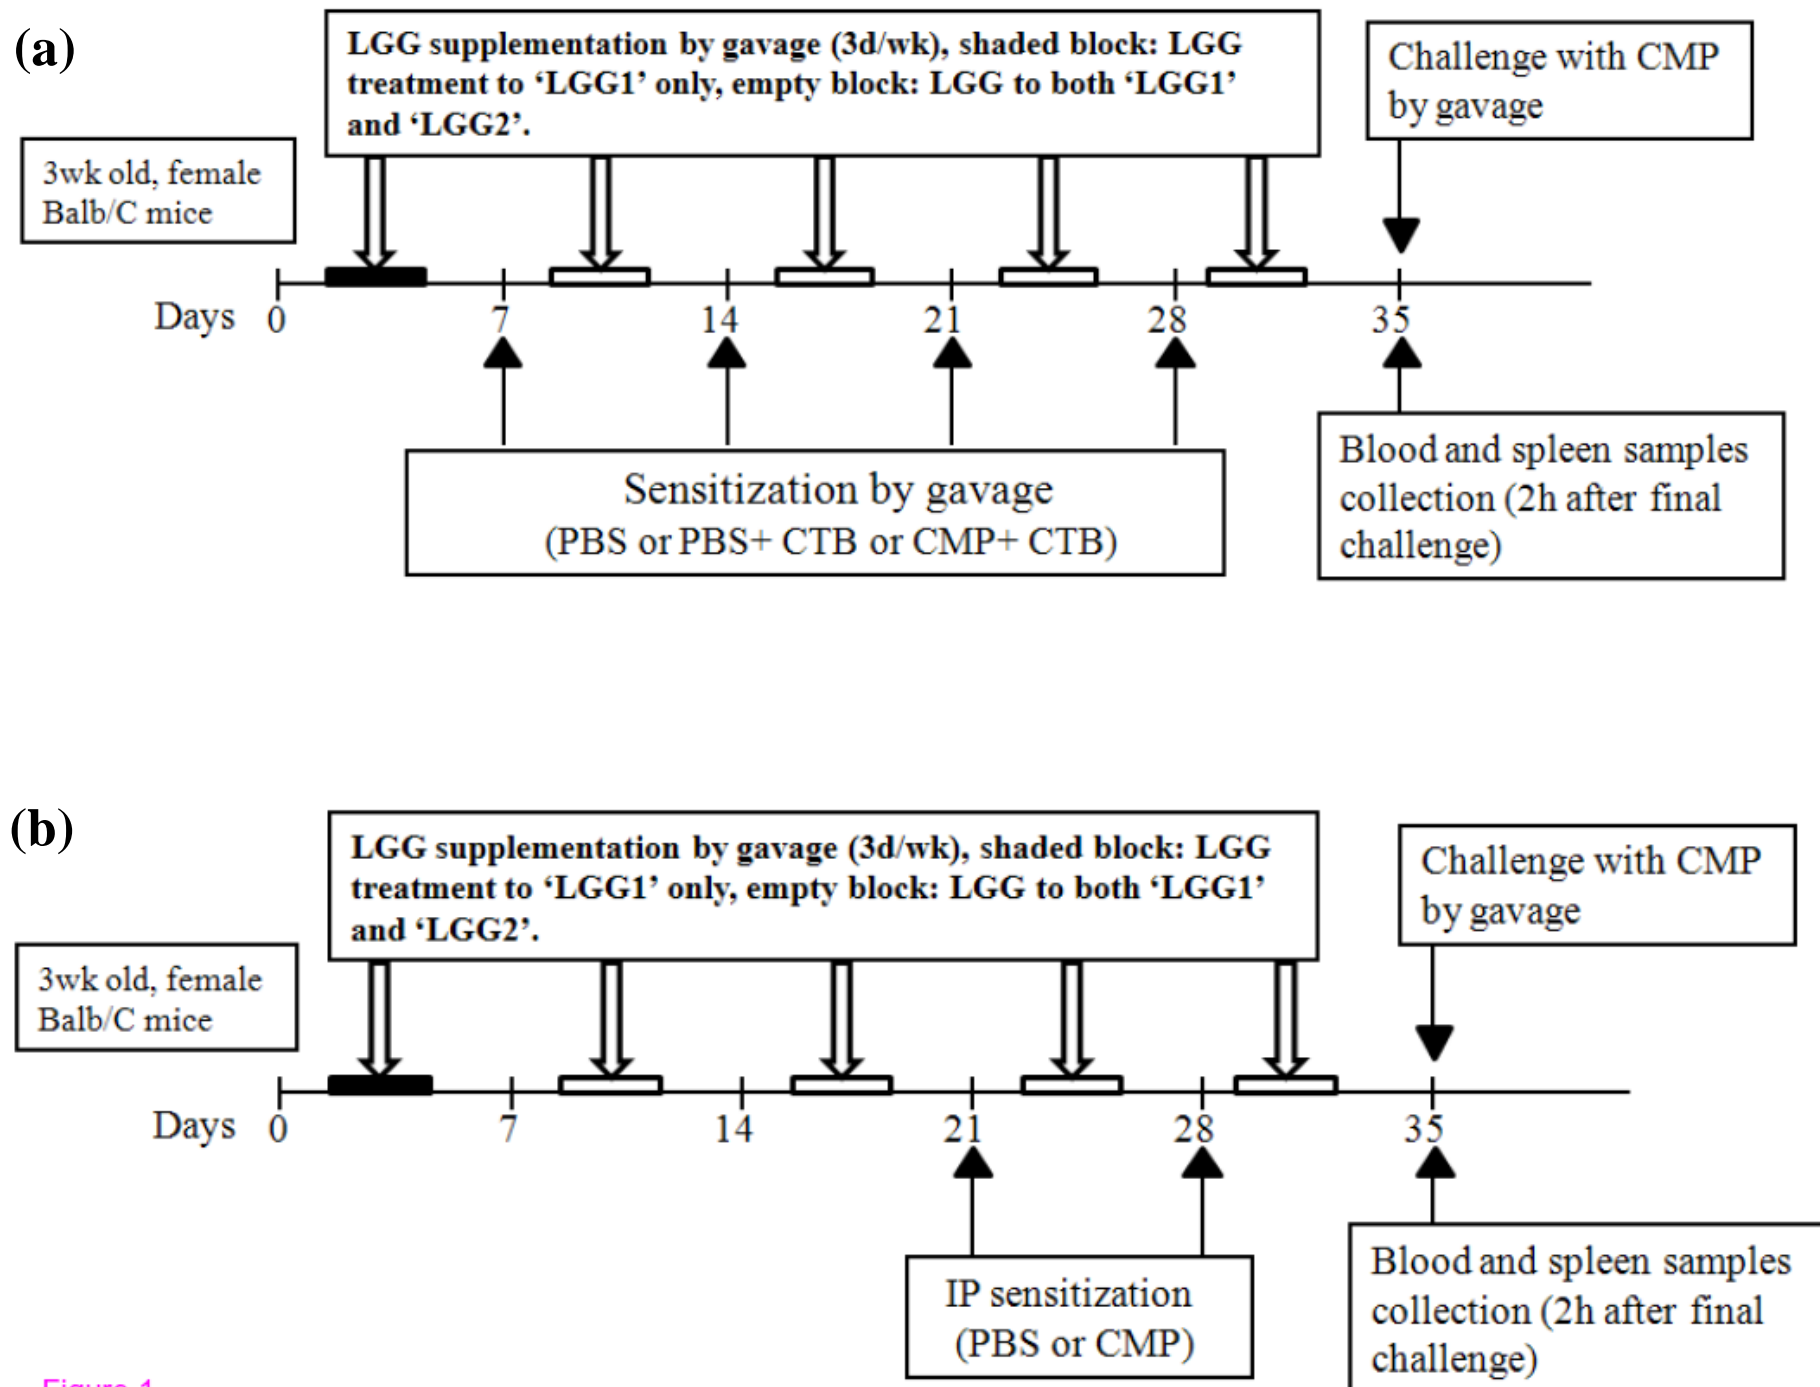

Figure 1

Supplement: MOESM1 [file 9597526]
